# Supplementary material for: Sub-Chronic Difenoconazole Exposure Induced Gut Microbiota Dysbiosis in Mice
Source: MDPI journal article supplement (doi:10.3390/toxics10010034), 2022-01-12
Supplement: s1 [file s1]

# Supplementary Materials: Sub-chronic Difenoconazole Exposure Induced Gut Microbiota Dysbiosis in Mice

Zhiwei Bao, Weitao Wang, Xiaofang Wang, Mingrong Qian and Yuanxiang Jin

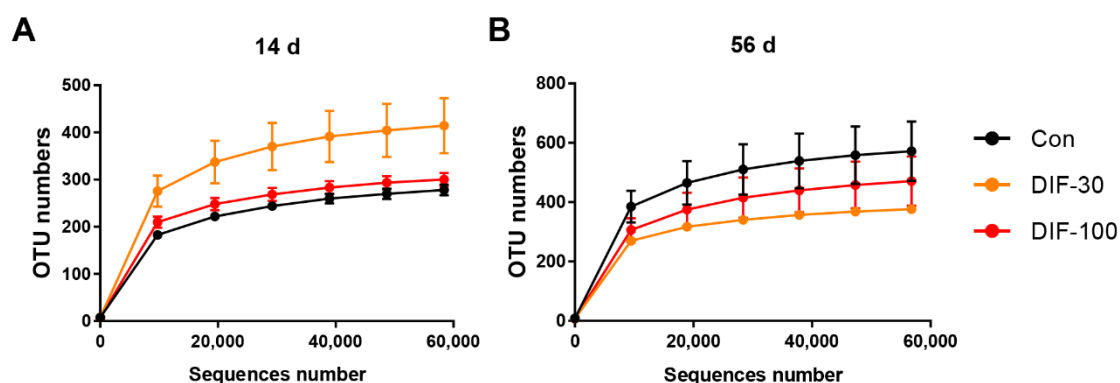

**Figure S1.** Rarefaction curves of 16S rRNA sequencing after (A) 14 days of DIF exposure and (B) 56 days of DIF exposure. The presented data are the Mean  $\pm$  SEM ( $n = 6$ ).
